# Supplementary material for: Effect on absorption and electron transfer by using Cd(ii) or Cu(ii) complexes with phenanthroline as auxiliary electron acceptors (A) in D–A–π–A motif sensitizers for dye-sensitized solar cells
Source: Royal Society of Chemistry journal article supplement (doi:10.1039/c7cp06859j), 2018-01-01
Supplement: c7cp06859j1.pdf [file c7cp06859j1.pdf]

## Support information

Effect on Absorption and Electron Transfer by Using Cd(II) or  
Cu(II) Complexes with Phenanthroline as Auxiliary Electron  
Acceptors(A) in D-A- $\pi$ -A Motif Sensitizers for Dye-sensitized  
Solar Cells

Chang Xia,<sup>a</sup> Chunxiao Zhu,<sup>a</sup> Xiaomei Zhao,<sup>a</sup> Xu Chen,<sup>a</sup> Tianqi  
Chen,<sup>a</sup> Ting Wan,<sup>a</sup> Zehua Xu,<sup>a</sup> Gaofeng Wen,<sup>a</sup> Yong Pei,<sup>\*a</sup>  
Chaofan Zhong<sup>\*a</sup>

<sup>a</sup>Key Laboratory of Environmentally Friendly Chemistry and Applications of  
Ministry of Education, Department of Chemistry, Xiangtan University, Xiangtan,  
Hunan 411105, China.

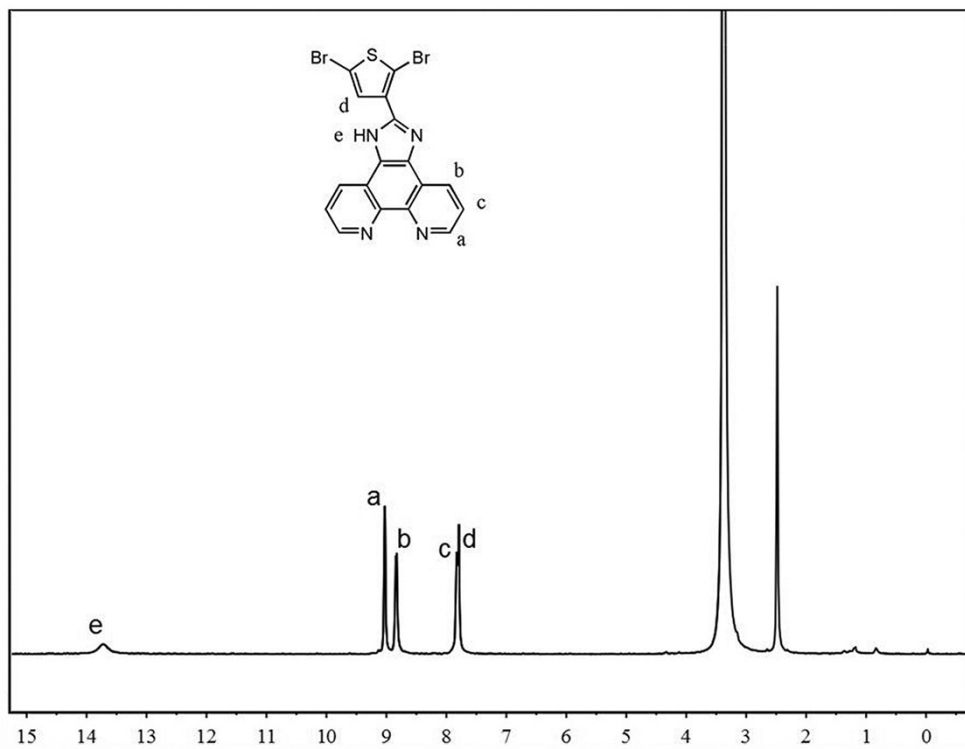

**Figure S1**  $^1\text{H}$  NMR spectra of compound **3** in  $\text{DMSO-}d_6$  solution

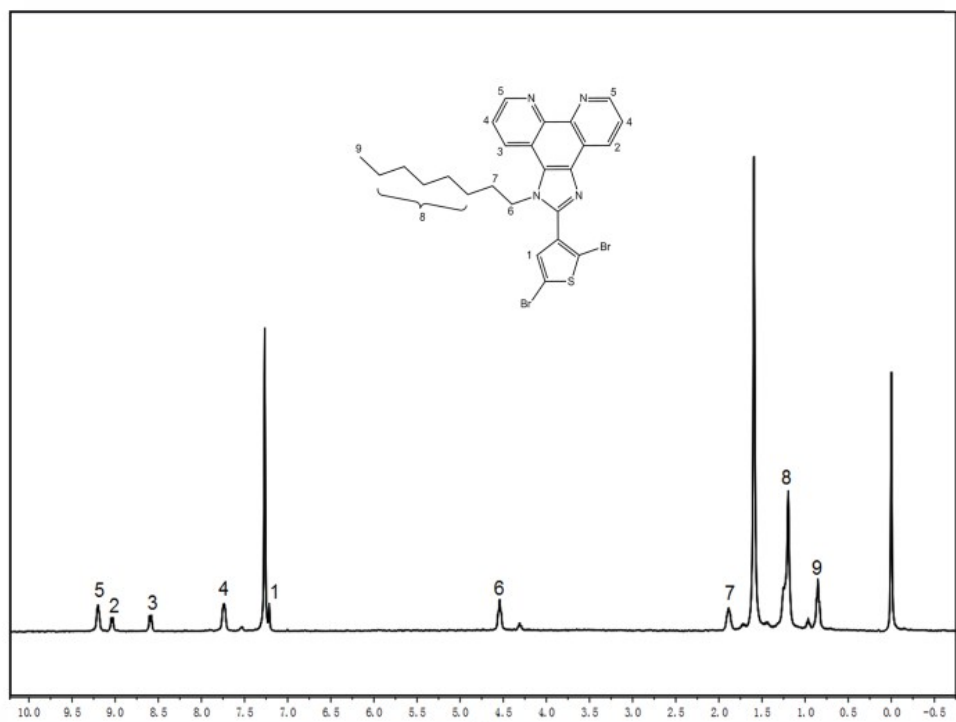

**Figure S2**  $^1\text{H}$  NMR spectra of compound **4** in  $\text{CDCl}_3-d_6$  solution

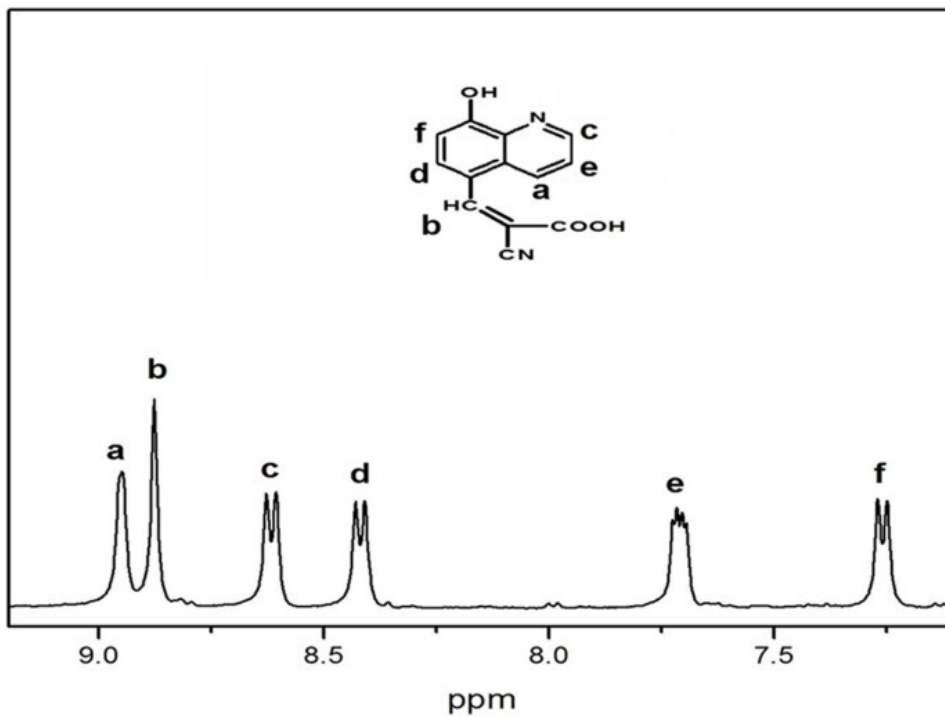

**Figure S3a**  $^1\text{H}$  NMR spectra of compound **6** in  $\text{DMSO-d}_6$  solution

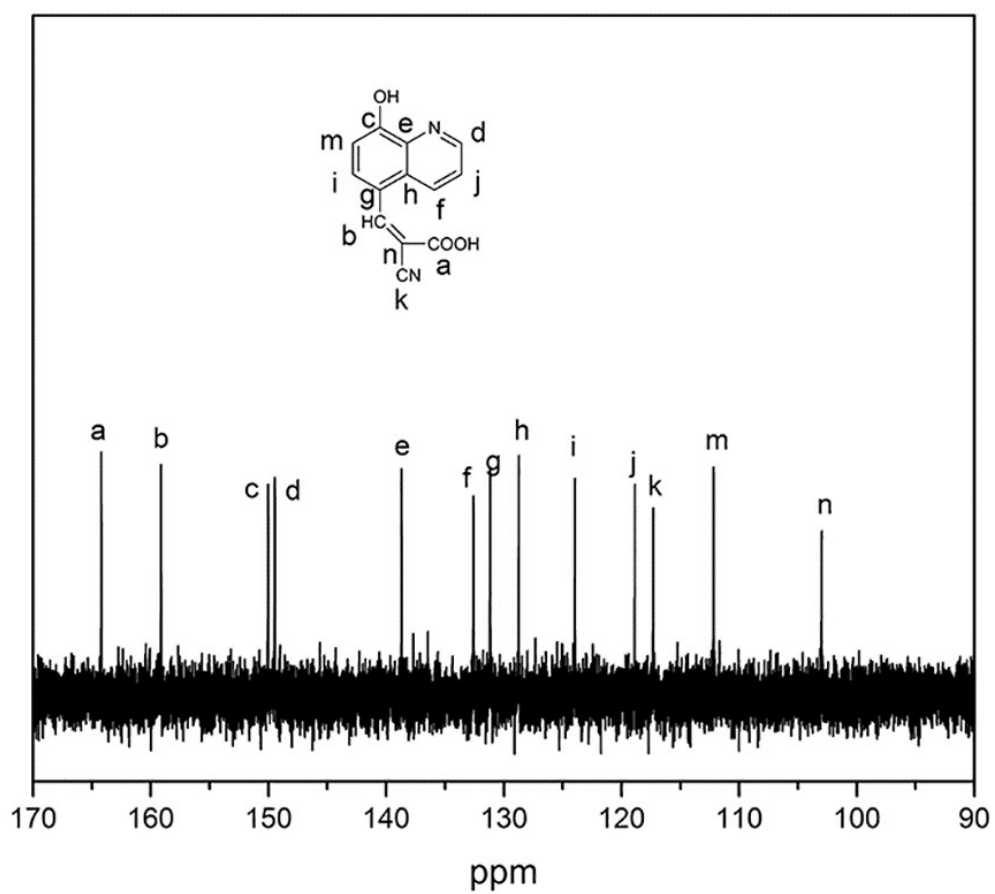

**Figure S3b**  $^{13}\text{C}$  NMR spectra of compound **6** in  $\text{DMSO-d}_6$  solution

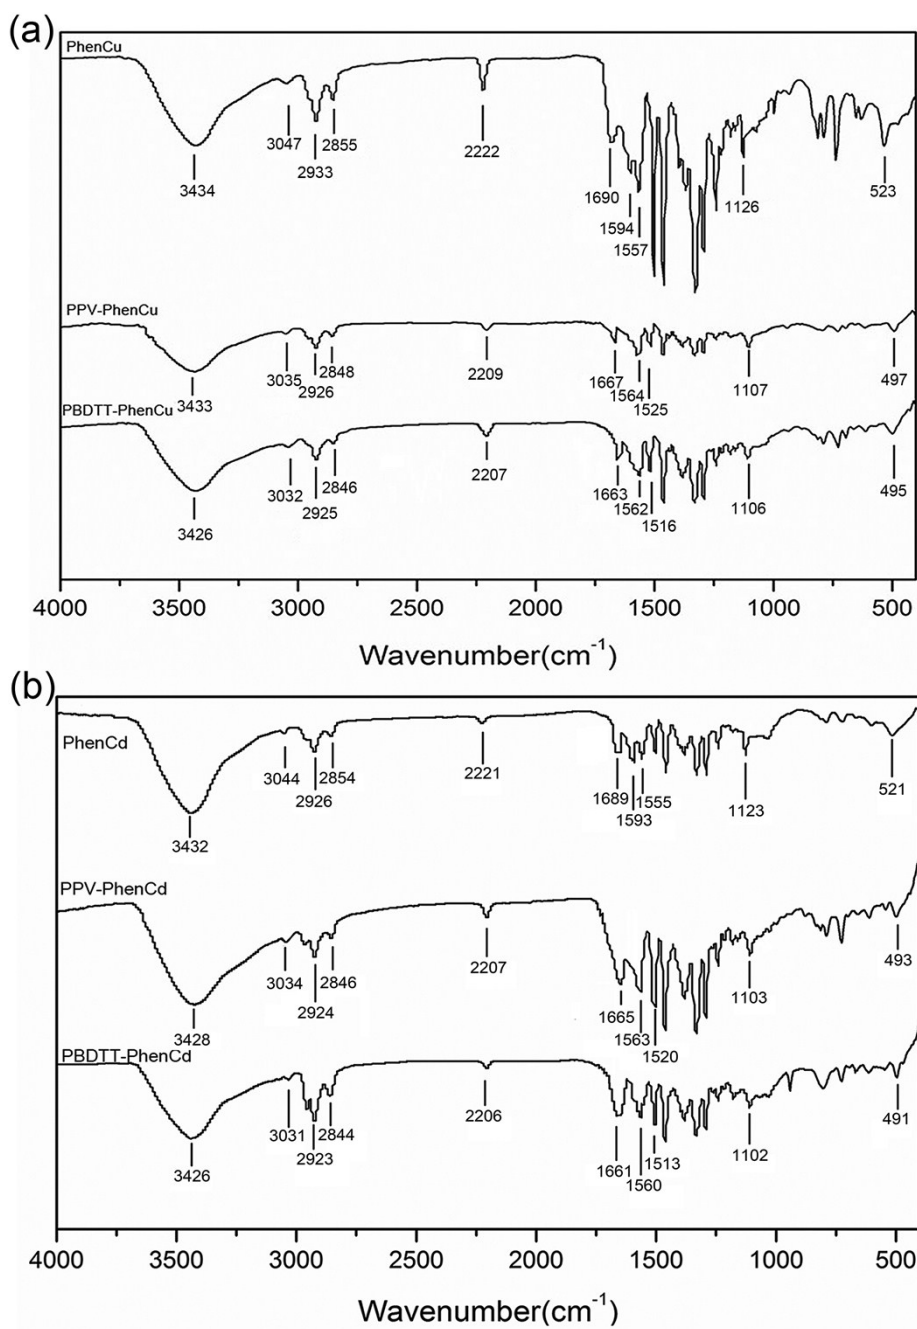

**Figure S4** FT-IR spectra of (a) **PhenCu**, **PPV-PhenCu**, **PBDTT-PhenCu** and (b) **PhenCd**, **PPV-PhenCd**, **PBDTT-PhenCd** with KBr pellet method.

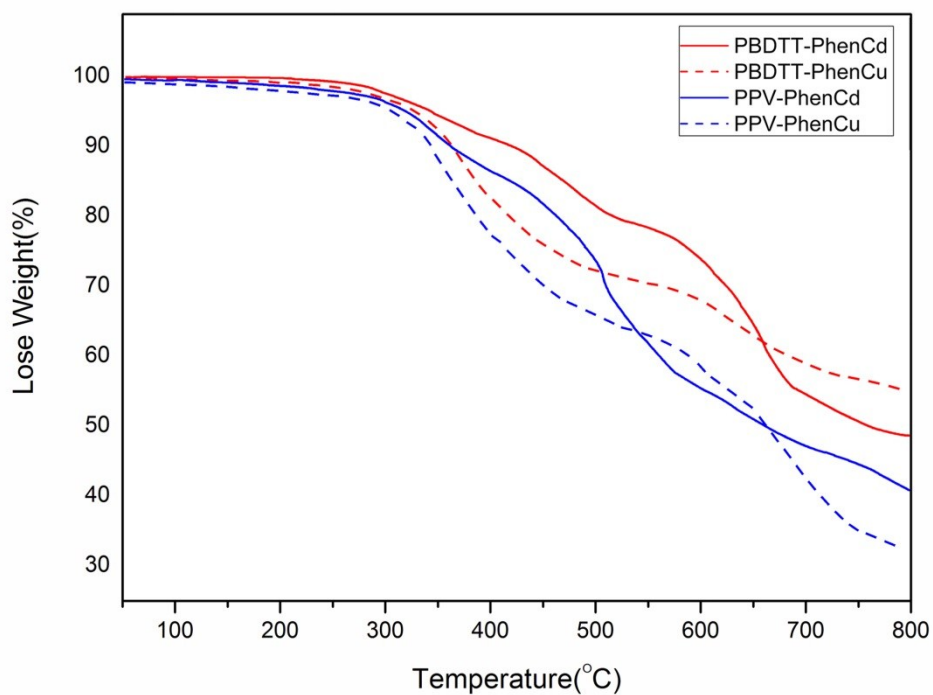

**Figure S5** TGA curves of polymers **PBDTT-PhenCu**, **PBDTT-PhenCd**, **PPV-PhenCu** and **PPV-PhenCd** with a heating rate of  $20\text{ }^{\circ}\text{C min}^{-1}$  under nitrogen atmosphere.
